# Supplementary material
Source: publisher figshare collection journal article supplement (https://frontiersin.figshare.com/ndownloader/files/14500676)
Supplement: Supplementary file [file 14500676]

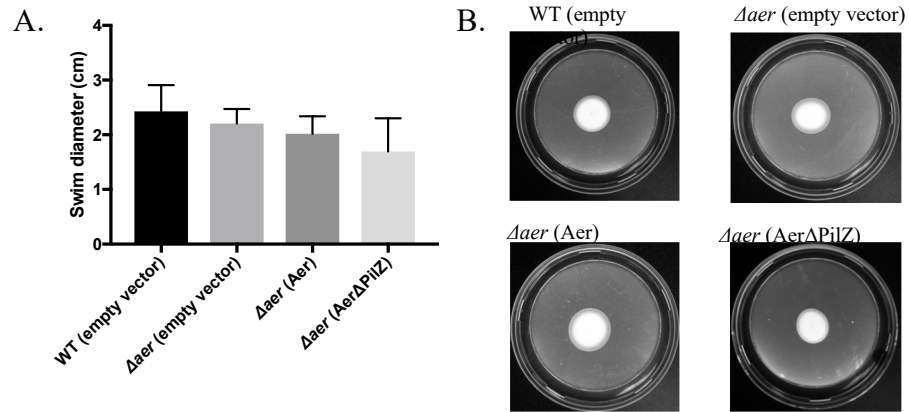

Fig S1: Chemotaxis in a soft agar plate containing 10mM malate. A) Average chemotaxis ring diameter of cells in a soft agar plate containing malate with standard deviation. Given in the average of 3 biological replicates. B) Representative images of WT(empty vector),  $\Delta aer$ (empty vector), and  $\Delta aer$ (pRK Aer), and  $\Delta aer$ (pRK Aer $\Delta PilZ$ ).
